# Supplementary material
Source: MDPI journal article supplement (https://www.mdpi.com/2311-7524/8/5/412)
Supplement: s1 [file s1]

```

1   ATGGAGTGAATTGAAAAATGCCAACAGGGTTCGACTGTGATGGTGTGCGAGCCAACTGAA
1   M E W N S K M P T G F D C D G V E P T E
61  CTCGCCCTACAAATGATTGAGACTGGCAAGGGTTTGGACATAGCATCTTTATGTAGCGGT
21  L A L Q M I E T G K G L D I A S L C S G
121 TTTGAAAGTGGATCTTCTTCAAGAAATCCTTTTGTAAACATCTGGTTCTTTCTGTAGG
41  F E S G S S S R N P F V T S G S F P V R
181 AATAAACTAGACGAAAACCTTCTCGGGATGGATAAGATAAGTGGGAGCTCAGGCGAATCG
61  N K L D E N F L G M D K I S G S S G E S
241 TTTAATAGTTTAGAACTTGAAATCAGAAAGTGTATAGACTGTCGTCTTCAATTCCAGTG
81  F N S L E L G N Q K V Y R L S S S I P V
301 TCGTGTACTGCTACAAAAGATCGAGGGCGTCTTATCAGAAAATGCAGAAATCCTTGTTC
101 S C T A T K R S R A S Y Q K M Q N P C
361 CAAGTTGAAGGGTGCAATCTTGATCTTACATTTGTGAAAGATTATCACCACGCCATAGA
121 Q V E G N L D L T F V K D Y H R R
421 ATCTGCGAAAGTCATTCCAAAAGCCCCAAGGTAATTGTCGTGGAATAGAAAGCGGTTT
141 I E S S K S P K V I V A G I E R R F
481 TGCCAACAATGCAGCAGATTCCATGGCTTGTCGGAGTTTGATGATAAAAAAGAAGCTGT
161 C Q Q C S R F H G L S E F D D K K R S
541 CGAAGGCGCCTCTCTGATCACAATGCCAGACGCCGTAGGCTGCAGCCTGAGTCGATCCAT
181 R R R L S D W N A R R R R L Q P E S I H
601 TTCAGTCATCAGGATTGTCTTCTTCTTATATGATTGGACATCACAGAATCTGCTGTTT
201 F S S S G L S S S L Y D W T S Q N L L F
661 AATGTACTCCCTATCTCGCTTTCAAATCGAACAGGGGAAAAGATCTACAATCTATGCTG
221 N V L P I S L S N R T G E K I Y N S M L
721 ACACAAGCCGGTGATTCCCTCGTTAGGCCTCCAAAGACTGGAGGAATTGATACACGACCG
241 T Q A G D S L V R P P K T G G I D T R P
781 TGTTTCCCAGTGATGAATTCCTTCTGCGGTTTATAACCTAAAAGTCGAATCAGAAAGG
261 C F P S D E F P S A V Y N L K V E S E R
841 TTATTGTCCCTTCAGAACCCGAATCGTCGGGCCCTAGATCAATATCTTCCGAGTGCTTCC
281 L L S L Q N P N R R A L D Q Y L P S A S
901 TCTCCTCTGTCAATCGATAATCCTTGGAGTTTGAATCGGTACGAATCCATTCTATGGAG
301 S P L S I D N P W S L N R Y E S I S M E
961 GGCTTAATGCACGGAACGCCAGAGTTGACAATCCGATTAGGCTGCAGAACTGGCCATTT
321 G L M H G N A R V D N P I R L Q N W P F
1021 CTTCAAGCAGCGGCAGACGAAGGGCCTTCTGTTTCTCCGGTGCATTGCTAGTTTACAT
341 L Q A A A D E G P S V S P V H S T S L H
1081 AATTCAGGCAGTTCCCTTTTGCAAGAGTTTGATTTATTCAAGACACCCTATGACTCAGGC
361 N S G S S L L Q E F D L F K T P Y D S G
1141 TGCTTTCATTCCAAAATGATCAAAGGAATATATAATTGGAATGA
381 C F H S K M I K G I Y N W K *

```

**Figure S1.** Nucleotide sequence and deduced amino acid sequence of SBP domain alignment of *OfSPL11*. The SBP domain is shown in red and the two zinc-binding sites of the C2HCH type (zinc finger 1 and zinc finger 2) are indicated with green and blue boxes. The conserved basic amino acids of the nuclear location signal are shaded in yellow.
