# Supplementary material
Source: MDPI journal article supplement (https://www.mdpi.com/2311-7524/8/5/412)
Supplement: s1 [file s1]

**Table S1.** Primer sequences used in this study.

| Primer name         | Primer sequences (5'→3')              | Purposes                    |
|---------------------|---------------------------------------|-----------------------------|
| <i>OfSPL11-F</i>    | AGAGGCAATGTTTAGGGAATC                 | Gene isolation              |
| <i>OfSPL11-R</i>    | GCCAACTTTTTGAAGCCTTAC                 | Gene isolation              |
| <i>AP1</i>          | GTAATACGACTCACTATAGGGC                | Promoter amplification      |
| <i>AP2</i>          | ACTATAGGGCACGCGTGGT                   | Promoter amplification      |
| <i>OfSPL11-GSP1</i> | TCTCGGGATGGATAAGATAAGTGGG             | Promoter amplification      |
| <i>OfSPL11-GSP2</i> | GTGATGGTGTCTGAGCCAACTGAACT            | Promoter amplification      |
| <i>OfSPL11-F2</i>   | CCG <u>CTCGAG</u> CGGATGGAGTGGAATT    | Heterologous transformation |
| <i>OfSPL11-R2</i>   | CCC <u>ATCGAT</u> GGGTTTCCAATTATA     | Heterologous transformation |
| <i>OfSPL11-F3</i>   | <u>GGCTAGCC</u> ATGGAGTGGAATT         | Subcellular localization    |
| <i>OfSPL11-R3</i>   | CGG <u>GATCCC</u> GTTTCCAATTATA       | Subcellular localization    |
| <i>OfSPL11-F4</i>   | AGGACCTGCATATGGCCATGGAGGCC <u>G</u>   | Transcriptional             |
|                     | <u>AATTC</u> ATGGAGTGGAATTCGAAAATGC   | activation                  |
| <i>OfSPL11-R4</i>   | TTATGCGGCCGCTGCAGGTCGAC <u>G</u> GAT  | Transcriptional             |
|                     | <u>CCTC</u> ATTTCGAATTATATATTCCTT     | activation                  |
| <i>proOfSPL11-F</i> | CCG <u>CTCGAG</u> CGGTTAATTTTACCGGACG | Transient transformation    |
| <i>proOfSPL11-R</i> | CGG <u>GATCCC</u> GCGGATAAAAGGGATTCC  | Transient transformation    |
| <i>qOfSPL11-F</i>   | TCGAGGGCGTCTTATCAGAAAATG              | qRT-PCR                     |
| <i>qOfSPL11-R</i>   | TACCTTGGGGCTTTTGGAATGACT              | qRT-PCR                     |
| <i>qOfACT-F</i>     | CCCAAGGCAAACAGAGAAAAAAT               | qRT-PCR                     |
| <i>qOfACT-R</i>     | ACCCCATCACCAGAATCAAGAA                | qRT-PCR                     |

|                           |                                    |                         |
|---------------------------|------------------------------------|-------------------------|
| <i>AtCBL1-F</i>           | GAAATGAACTGGCTGATGAAACCATAGAG      | qRT-PCR                 |
| <i>AtCBL1-R</i>           | CTCGTGGCAATCTACTCGGTCTTAAACC       | qRT-PCR                 |
| <i>AtSOS2-F</i>           | ATTGAGGCTGTAGCGAAC                 | qRT-PCR                 |
| <i>AtSOS2-R</i>           | GGTATTCCTTCTGTTGCC                 | qRT-PCR                 |
| <i>AtSOS3-F</i>           | GGAGGAATCTCTTCGCTG                 | qRT-PCR                 |
| <i>AtSOS3-R</i>           | CACGAAAGCCTTATCCACC                | qRT-PCR                 |
| <i>AtCOR6.6-F</i>         | GTCAGAGACCAACAAGAATGCC             | qRT-PCR                 |
| <i>AtCOR6.6-R</i>         | TGACTCGAATCGCTACTTGTTT             | qRT-PCR                 |
| <i>AtCOR15A-F</i>         | GCGAACAATCCTTCACAG                 | qRT-PCR                 |
| <i>AtCOR15A-R</i>         | CTTCGGGAGACCCACCT                  | qRT-PCR                 |
| <i>AtRD29A-F</i>          | TGAAAGGAGGAGGAGGAATGGTTGG          | qRT-PCR                 |
| <i>AtRD29A-R</i>          | ACAAAACACACATAAACATCCAA AGT        | qRT-PCR                 |
| <i>Atactin2-F</i>         | TTGTGCTGGATTCTGGTGATGG             | qRT-PCR                 |
| <i>Atactin2-R</i>         | CCGCTCTG CTGTTGTGGTG               | qRT-PCR                 |
| <i>OfSPL11pro-pHIS2-F</i> | GACTCACTATAGGGCGAATTCTTTACCGGACGA  | Yeast one-hybrid assays |
|                           | ACCAAATCTT                         |                         |
| <i>OfSPL11pro-pHIS2-R</i> | CCAGGAATTTCTAGACCGCGGGGATTCCCTAA   | Yeast one-hybrid assays |
|                           | ACATTGCCT                          |                         |
| <i>AD-OfZAT12-F</i>       | CATATGGCCATGGAGGCCAGTGAATTCATGGTGT | Yeast one-hybrid assays |
|                           | TGGATTTACAAATGACG                  |                         |
| <i>AD-OfZAT12-R</i>       | CATCTGCAGCTCGAGCTCGATGGATCCATGGTGT | Yeast one-hybrid assays |
|                           | TGGATTTACAAATGACG                  |                         |

|                         |                                   |                            |
|-------------------------|-----------------------------------|----------------------------|
| <i>OfSPL11pro:LUC-F</i> | TCCCCCGGGGGGATTCCCTAAACATTGCCTCTG | Transient expression assay |
| <i>OfSPL11pro:LUC-R</i> | GGGGTACCCCTTTACCGGACGAACCAAATCTT  | Transient expression assay |
| <i>35Spro:OfZAT12-F</i> | ATGGTGTGGATTACAAATGACG            | Transient expression assay |
| <i>35Spro:OfZAT12-R</i> | GCAGGAACCATTTTCCCGAAGAG           | Transient expression assay |
| <i>qOfZAT12-F</i>       | ATGACGATGAAGAGGAGTAGAGA           | qRT-PCR                    |
| <i>qOfZAT12-R</i>       | GAATGTTGTTCTCCCATCAGCC            | qRT-PCR                    |

F indicates forward primer, R indicates reversed primer and the underline indicate restriction sites.
