# Supplementary material
Source: MDPI journal article supplement (https://www.mdpi.com/2311-7524/8/5/412)
Supplement: s1 [file s1]

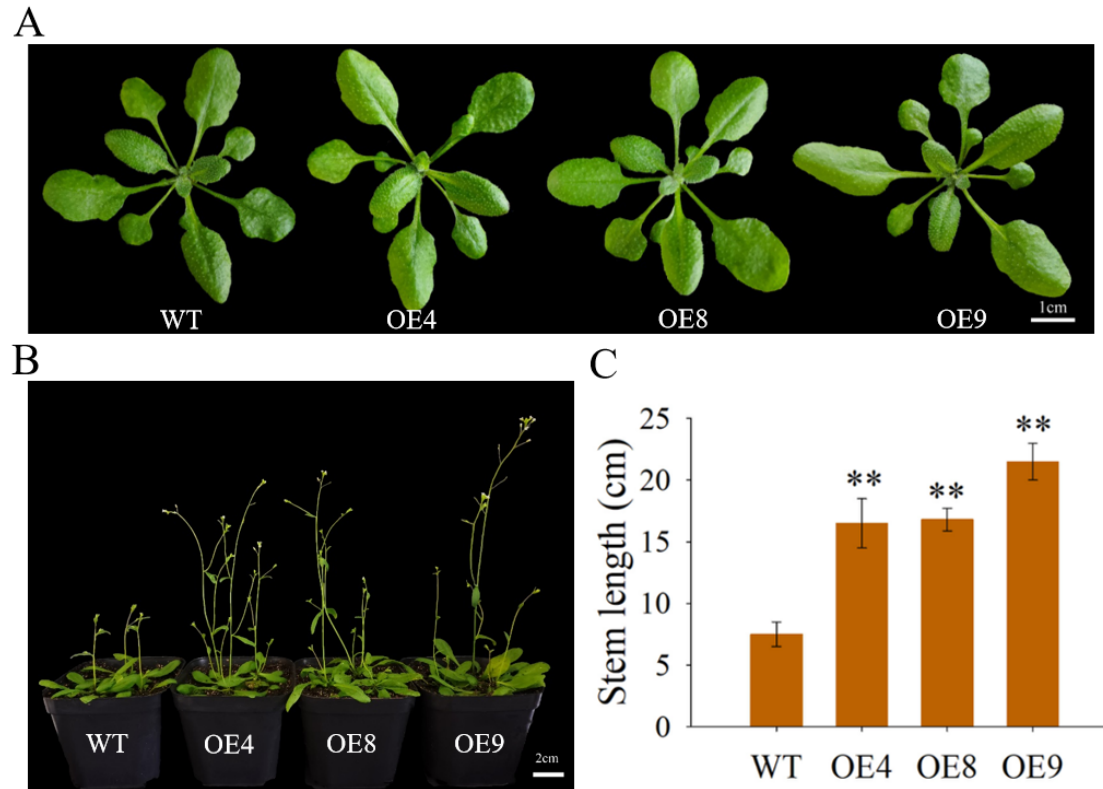

**Figure S2.** Phenotype of *OfSPL11* transgenic plants. **(A)** Fifteen-day-old plants of the WT and three *OfSPL11* transgenic lines. Scale bars = 1cm. **(B)** Plants and **(C)** stems length of 5-week-old plants of the WT and transgenic lines; representative specimens of average length were selected. Scale bars = 2cm. \*\*  $p < 0.01$  were used to determine statistical significance.
