# Supplementary material
Source: MDPI journal article supplement (https://www.mdpi.com/2311-7524/8/5/412)
Supplement: s1 [file s1]

**Table S2.** Rosette leaf number and shape of *Arabidopsis*.

| Genotype  | Rosette leaf number | Leaf length   | Leaf width    |
|-----------|---------------------|---------------|---------------|
| Wild type | 9.125 ± 1.013       | 4.638± 0.264  | 1.275 ± 0.060 |
| OE4       | 9.167 ± 0.1067      | 4.754 ± 0.251 | 1.289 ± 0.056 |
| OE8       | 9.000 ± 0.957       | 4.583 ± 0.291 | 1.26 ± 0.054  |
| OE9       | 9.083 ± 0.954       | 4.625 ± 0.317 | 1.269 ± 0.051 |

Total rosette leaf number was counted on three-week-old plants (n = 18 plants, ± SD).
